# Supplementary material for: Restoring the osteogenic activity of bacterial debris contaminated titanium by doping with magnesium
Source: Royal Society of Chemistry journal article supplement (doi:10.1039/c6ra11854b), 2016-01-01
Supplement: c6ra11854b1.pdf [file c6ra11854b1.pdf]

## Supporting information

Restore the osteogenic activity of bacterial debris contaminated titanium by doping  
of magnesium

Yaochao Zhao<sup>†, #</sup>, Huiliang Cao<sup>‡, #</sup>, Jiaying Wang<sup>†</sup>, Hui Qin<sup>†</sup>, Li Bin<sup>†</sup>, Donghui Wang<sup>‡</sup>,  
Fanhao Meng<sup>‡</sup>, Xianlong Zhang<sup>†, \*</sup>, Xuanyong Liu<sup>‡, \*</sup>

<sup>†</sup> Department of Orthopedics, Shanghai Sixth People's Hospital, Shanghai Jiao Tong  
University, Shanghai 200233, China

<sup>‡</sup> State Key Laboratory of High Performance Ceramics and Superfine Microstructure,  
Shanghai Institute of Ceramics, Chinese Academy of Sciences, Shanghai 200050,  
China

### Corresponding

\*E-mail: zhangxianl197826@163.com (X. Zhang); xyliu@mail.sic.ac.cn (X. Liu);

#These authors contributed equally.

**Figure S1.** Cell proliferation of the human mesenchymal stem cells (hBMSCs) seeded on Ti with the presence of different concentration of LPS. \*\*P<0.01.

**Figure S2.** Extracellular matrix mineralization after 14 days of culture with the presence of different concentration of LPS was determined by alizarin red staining. \*P <0.05.

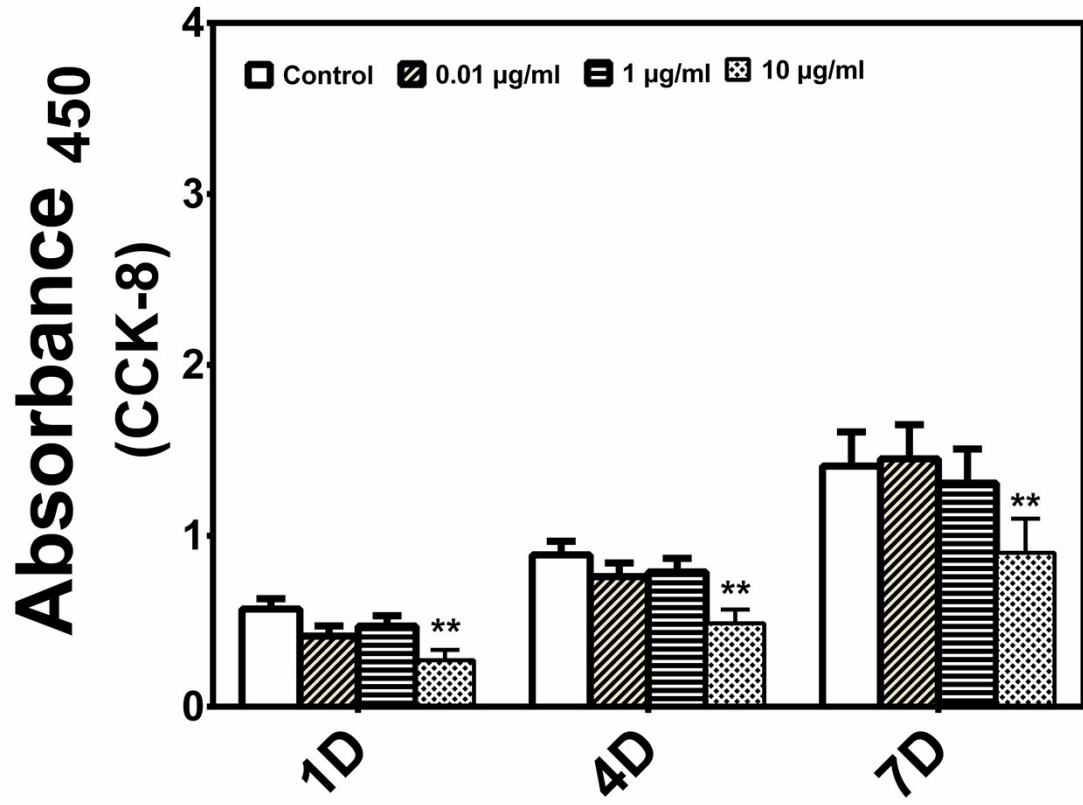

Figure S1

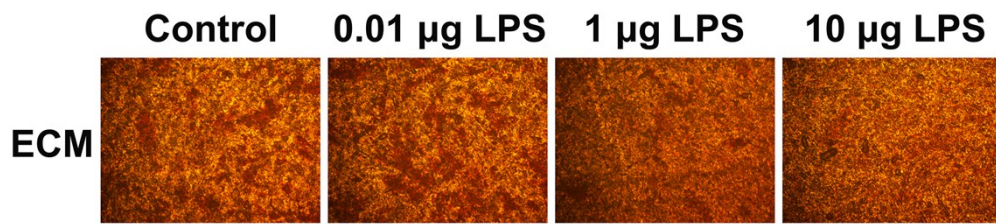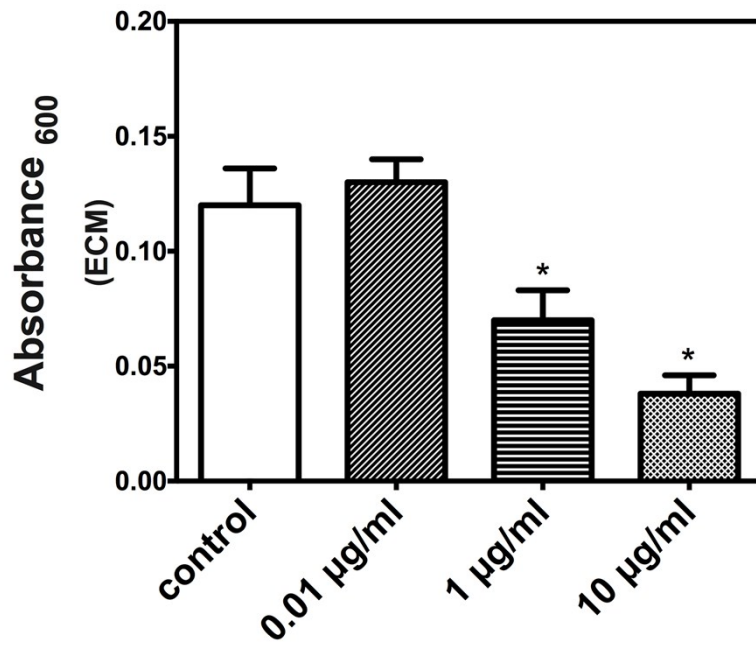

Figure S2
